# Supplementary material for: Widespread expression of Sonic hedgehog (Shh) and Nrf2 in patients treated with cisplatin predicts outcome in resected tumors and are potential therapeutic targets for HPV-negative head and neck cancer
Source: PubMed Central journal article supplement — Ther Adv Med Oncol. 2020 Mar 13;12:1758835920911229. doi: 10.1177/1758835920911229 (PMC7074584; doi:10.1177/1758835920911229), 2020-03-13
Supplement: Supplementary_Table__S1.pdf [file Supplementary_Table__S1.pdf]

**Supplementary Table S1. Patients characteristics**

| <i>Patients characteristics</i> | <i>N (%)</i> | <i>Patients characteristics</i> | <i>N (%)</i> |
|---------------------------------|--------------|---------------------------------|--------------|
| <b>Gender</b>                   |              | <b>N-stage</b>                  |              |
| Male                            | 102 (55.74)  | 0                               | 39 (21.311)  |
| Female                          | 81 (44.26)   | 1                               | 21 (11.48)   |
| <b>Age</b>                      |              | 2                               | 20 (10.93)   |
| Min                             | 29           | 2A                              | 34 (18.58)   |
| Max                             | 87           | 2B                              | 58 (31.69)   |
| Mean                            | 61.7         | 2C                              | 11 (6.01)    |
| <b>Tumor site</b>               |              | <b>M-stage</b>                  |              |
| Oral cavity                     | 56 (30.61)   | 1                               | 162 (88.52)  |
| Oropharyngeal                   | 85 (46.45)   | 2                               | 21 (11.48)   |
| Laryngeal                       | 42 (22.95)   | <b>Tumor grade</b>              |              |
| <b>Tumor stage</b>              |              | Poorly differentiated           | 70 (38.25)   |
| 1                               | 29 (15.85)   | Moderately differentiated       | 64 (34.92)   |
| 2                               | 21 (11.48)   | Well differentiated             | 49 (26.26)   |
| 3                               | 48 (26.23)   | <b>Chemotherapy</b>             |              |
| 4                               | 55 (30.05)   | Yes                             | 115 (62.84)  |
| 4A                              | 30 (16.40)   | No                              | 68 (37.16)   |
| <b>Tumor T-stage</b>            |              | <b>Metastasis</b>               |              |
| 1                               | 12 (6.56)    | Yes                             | 39 (21.31)   |
| 1A                              | 18 (9.84)    | No                              | 144 (78.69)  |
| 2                               | 71 (38.80)   | <b>Recurrence</b>               |              |
| 3                               | 33 (18.03)   | Yes                             | 32 (17.49)   |
| 3B                              | 2 (1.09)     | No                              | 151 (82.51)  |
| 4                               | 43 (23.50)   | <b>HPV status</b>               |              |
| 4A                              | 1 (0.55)     | Positive                        | 183 (100.00) |
| 4B                              | 3 (1.64)     | Negative                        | 0 (0.00)     |
