# Supplementary material for: Widespread expression of Sonic hedgehog (Shh) and Nrf2 in patients treated with cisplatin predicts outcome in resected tumors and are potential therapeutic targets for HPV-negative head and neck cancer
Source: PubMed Central journal article supplement — Ther Adv Med Oncol. 2020 Mar 13;12:1758835920911229. doi: 10.1177/1758835920911229 (PMC7074584; doi:10.1177/1758835920911229), 2020-03-13
Supplement: Supplementary_Table_S2.pdf [file Supplementary_Table_S2.pdf]

**Supplementary Table S2.** Head and neck squamous cell carcinoma patients clinicopathological feature and association of the expression of Shh and Nrf2.

| <b>Patients characteristics</b> | <b>Cases (%)</b> | <b>Shh high</b> | <b>Shh low</b> | <b>p-value<sup>a</sup></b> | <b>Nrf2 high</b> | <b>Nrf2 low</b> | <b>p-value<sup>b</sup></b> |
|---------------------------------|------------------|-----------------|----------------|----------------------------|------------------|-----------------|----------------------------|
| <b>All patients</b>             | 183(100%)        |                 |                |                            |                  |                 |                            |
| <b>Gender</b>                   |                  |                 |                |                            |                  |                 |                            |
| Male                            | 102(55.74)       | 49              | 53             | ns                         | 75               | 27              | ns*                        |
| Female                          | 81(44.26)        | 33              | 48             |                            | 33               | 48              |                            |
| <b>Chemotherapy</b>             |                  |                 |                |                            |                  |                 |                            |
| Yes                             | 115(62.84)       | 73              | 42             | 0.008                      | 81               | 34              | 0.02                       |
| No                              | 68(37.16)        | 25              | 43             |                            | 18               | 50              |                            |
| <b>Lymph node</b>               |                  |                 |                |                            |                  |                 |                            |
| Positive                        | 57(31.15)        | 31              | 26             | 0.004                      | 13               | 44              | ns*                        |
| Negative                        | 126(68.85)       | 12              | 114            |                            | 18               | 108             |                            |
| <b>Recurrence</b>               |                  |                 |                |                            |                  |                 |                            |
| Yes                             | 32(17.49)        | 29              | 3              | 0.006                      | 9                | 23              | ns*                        |
| No                              | 151(82.51)       | 17              | 134            |                            | 21               | 130             |                            |
| <b>Metastasis</b>               |                  |                 |                |                            |                  |                 |                            |
| Yes                             | 39(21.31)        | 33              | 6              | 0.05                       | 19               | 14              | ns*                        |
| No                              | 144(78.69)       | 27              | 117            |                            | 19               | 125             |                            |

**Abbreviations:** ns-not significant. <sup>a</sup> High Shh vs low Shh expression. Statistical analysis was performed using Chi-square and Fisher's exact test. <sup>b</sup> High Nrf2 vs low Nrf2 expression. Statistical analysis was performed using Chi-square and Fisher's exact test.
